# Supplementary figures and images for: Improving accessibility of trust guidelines and protocols at the Great Western Hospital, Swindon
Source: HighWire-hosted journal article supplement (doi:10.1136/bmjquality.u202615.w1585), 2014-01-01

Figure 6

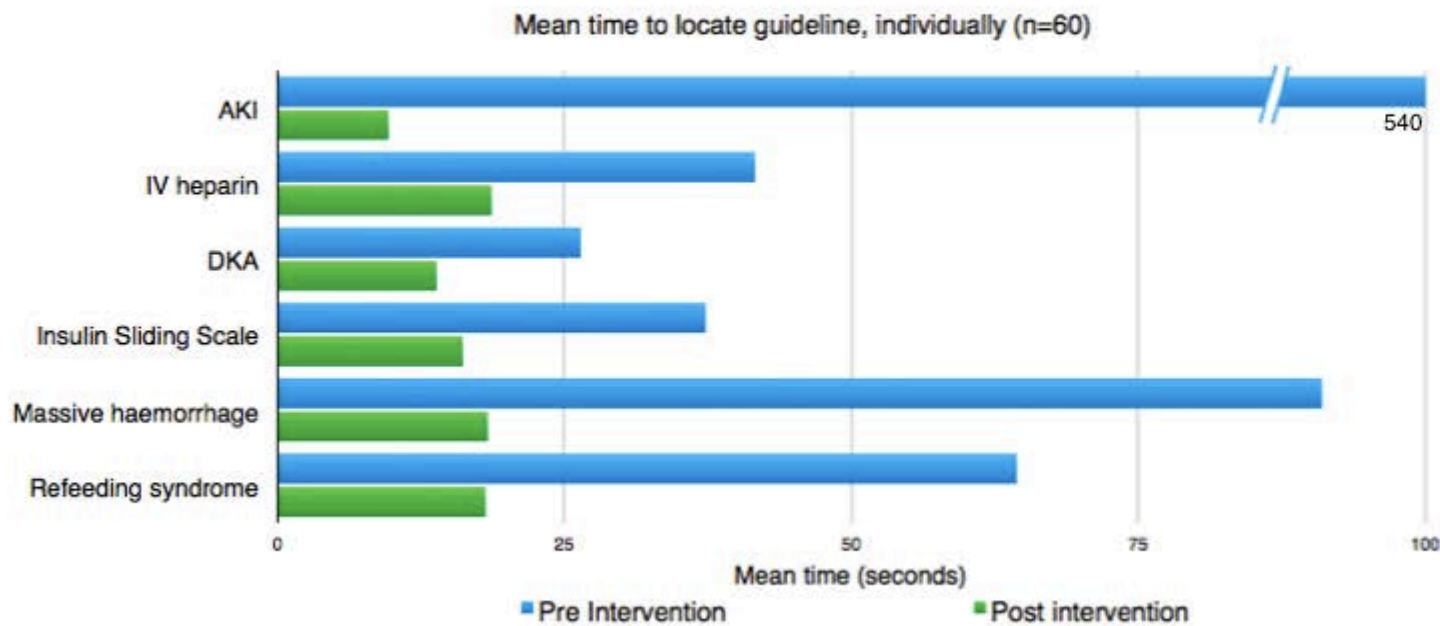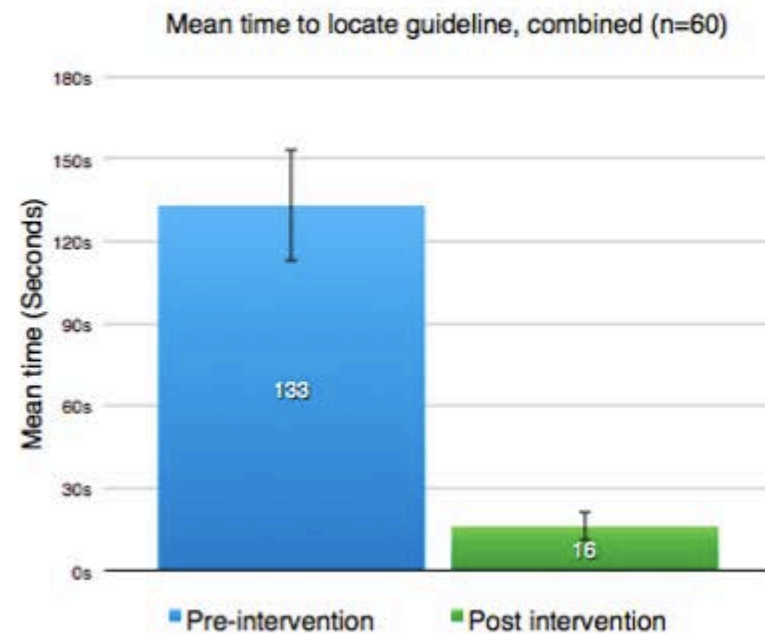

Supplement: ds4330.pdf [file ds4330.pdf]
